# Supplementary material
Source: HighWire-hosted journal article supplement (https://www.cmajopen.ca/highwire/filestream/81323/field_highwire_adjunct_files/1/2018-0185-2-at.pdf)
Supplement: 2018-0185-2-at.pdf [file 2018-0185-2-at.pdf]

## Appendix 2 (as supplied by the authors): Supplemental statistical and sensitivity analysis

Model discrimination (predictive accuracy) was assessed by the area under the receiver operating characteristic curve (AUROC) represented by the c-statistic. We used a threshold of a c-statistic value of 0.70 and above indicates good discrimination between those admitted versus not admitted(1). We evaluated the model's ability to predict subgroups of patients with a differing risk of index hospitalization by plotting predicted vs. observed events in deciles(2, 3). Each model was validated through cross-validation (4).

As a check for collinearity, we also re-ran each multivariable model using the forward stepwise procedure with p-value <0.1 set as the inclusion criterion and p-value >0.05 as the removal threshold. We then compared the final selection of variables, the sign and magnitude of the odds ratios (OR) as well as their standard errors (SE): no discrepancy with the original results provided further evidence of a good fit and no/low collinearity. The results of the stepwise approach were closely aligned with the original models (data available from the authors on request).

We also re-ran the models individually on 5 most costly conditions in both cohorts: the predictor estimates remained unaffected while c-statistics improved to above 0.7, especially among HCUs (Appendix 4).

1. Hosmer DW, Lemeshow S. Applied Logistic Regression (2nd Edition). New York, NY: John Wiley & Sons; 2000.
2. Kramer AA, Zimmerman JE. Assessing the calibration of mortality benchmarks in critical care: The Hosmer-Lemeshow test revisited. *Critical care medicine*. 2007;35(9):2052-6.
3. Pocock SJ, Wang D, Pfeffer MA, Yusuf S, McMurray JJ, Swedberg KB, et al. Predictors of mortality and morbidity in patients with chronic heart failure. *European heart journal*. 2006;27(1):65-75.
4. ROC analysis using validation data and cross validation. SAS Support. © SAS Institute Inc. [Available from: <http://support.sas.com/kb/39/724.html>].
5. Clark D, Armstrong M, Allan A, Graham F, Carnon A, Isles C. Imminence of death among hospital inpatients: Prevalent cohort study. *Palliative medicine*. 2014;28(6):474-9.
